# Supplementary material for: Mechanisms linking family socioeconomic status to children’s depressive symptoms: a longitudinal moderated mediation analysis
Source: Research Square preprint supplement (doi:10.21203/rs.3.rs-8781079/v1), 2026-02-17
Supplement: Supplementary file 1 [file 64a8c8096b675b645eae5a04.docx]

**Article Title:**

Mechanisms linking family socioeconomic status to children’s depressive symptoms: a longitudinal moderated mediation analysis

**Supplementary Material**


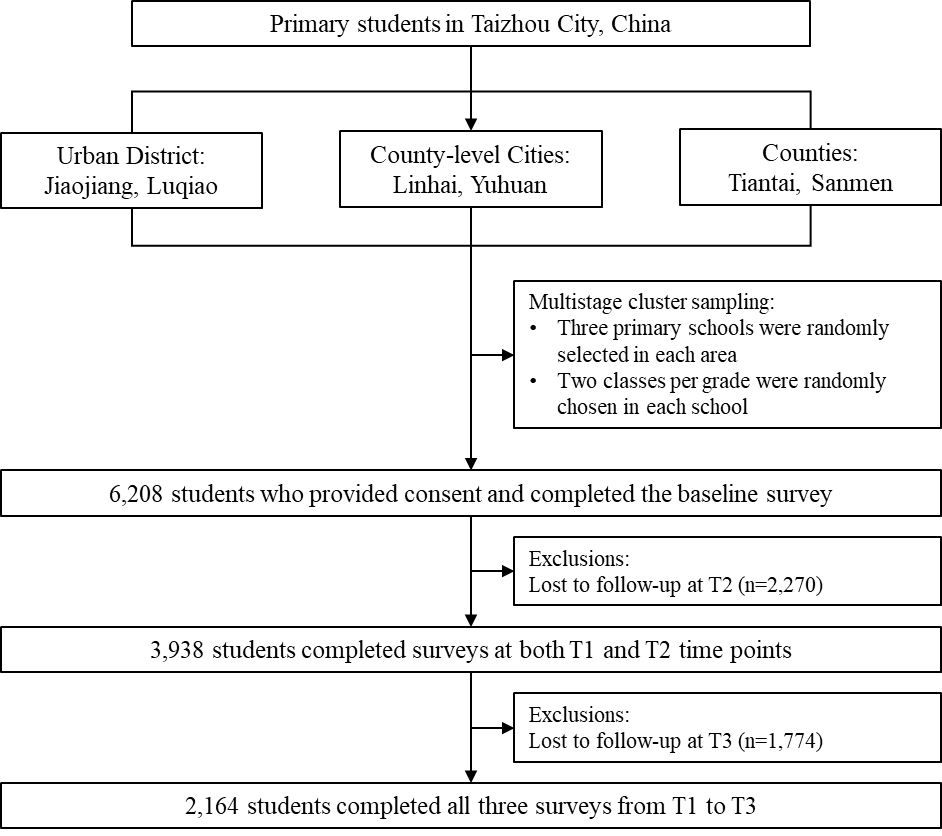


**Fig.S1** Flow chart showing sample size included in the study.

**Table S1** Summary of variables.

| **Variables** | **Details of variables** |
| --- | --- |
| **Family socioeconomic status relevant variables (measured at T1)** | |
| Parents’ education | Composite measure of parental educational attainment, the score ranges from 2 to 8, with a higher score indicating a higher overall parental education level. |
| Family economic status | Dichotomous measure of perceived family financial wellbeing (0 = Relatively poor, 1 = Fair or good). |
| Average living space per person | Continuous observed variable calculated by dividing total household floor area by the number of co-residents (unit: m²/person). |
| **Mediators (measured at T2)** | |
| Loneliness | Latent measure of loneliness using three items of UCLA (relational connectedness, social connectedness and self‐perceived isolation). |
| Social support | Latent measure of social support using three dimensions of MSPSS (family support, friends support and other significant support). |
| Parent-child relationship | Latent measure of the overall parent-child relationship quality, reflected by two observed items (relationship with father and relationship with mother) |
| **Mental health outcomes (measured at T3)** | |
| Depressive symptoms | Scores of CDI, where higher scores indicate more severe depressive symptoms. |
| **Covariates** | |
| Age, sex, school type, household registration, parents' marital status, frequency of physical activity per week | |

*Abbreviations:* CDI, children's depression inventory; MSPSS, Multidimensional Scale of Perceived Social Support; UCLA, UCLA loneliness scale.

**Table S2** Participant characteristics between those followed at T2 and T3 and those lost to follow-up at T2 and T3

|  | **Lost to follow-up at T2 and T3** | **Followed at T2 and T3** |
| --- | --- | --- |
| N | 4044 | 2164 |
| Age, years | 10.0±1.8 | 9.3±1.4 |
| Sex |  |  |
| Female | 1801 (44.5%) | 1006 (46.5%) |
| Male | 2243 (55.5%) | 1158 (53.5%) |
| School |  |  |
| Public school | 3771 (93.2%) | 1956 (90.4%) |
| Non-public school | 273 (6.8%) | 208 (9.6%) |
| Household registration |  |  |
| Urban | 1164 (28.8%) | 831 (38.4%) |
| Rural | 2880 (71.2%) | 1333 (61.6%) |
| Parents’ marital status |  |  |
| Married | 3638 (90.0%) | 2006 (92.7%) |
| Others | 406 (10.0%) | 158 (7.3%) |
| Frequency of physical activity per week (excluding physical education classes) | 3.2±1.8 | 3.4±1.8 |
| Father’s education |  |  |
| Primary school or lower | 247 (6.1%) | 68 (3.1%) |
| Middle school | 1412 (34.9%) | 586 (27.1%) |
| High school | 1215 (30.1%) | 669 (30.9%) |
| College or higher | 1170 (28.9%) | 841 (38.9%) |
| Mother’s education |  |  |
| Primary school or lower | 305 (7.5%) | 83 (3.8%) |
| Middle school | 1309 (32.4%) | 513 (23.7%) |
| High school | 1089 (26.9%) | 587 (27.1%) |
| College or higher | 1341 (33.2%) | 981 (45.3%) |
| Family economic status |  |  |
| Good | 408 (10.1%) | 191 (8.9%) |
| Fair | 3346 (82.7%) | 1853 (85.6%) |
| Poor | 290 (7.2%) | 120 (5.5%) |
| Average living space per person, m2 | 33.3±15.7 | 32.2±14.8 |

*Note*: Data are mean (SD) or n (%) unless otherwise indicated.

**Table S3** Effect size and standardized regression coefficients for the indirect effects for parents’ education, family economic status and average living space per person on depressive symptoms via measurement factors of the latent variables (loneliness, social support and parent-child relationship)

|  | **Depressive symptoms** | |
| --- | --- | --- |
|  | **Indirect effects** | **Effect size** |
| **Model 1: measurement factors of loneliness** (CFI 0.976, TLI 0.887, RMSEA 0.051, sRMR 0.019) | | |
| **Parents’ education** |  |  |
| Via relational connectedness | -0.002 (-0.004, 0.001) | - |
| Via social connectedness | -0.007 (-0.017, 0.002) | - |
| Via self-perceived isolation | -0.010 (-0.019, -0.001) * | 7.75% |
| **Family economic status** |  |  |
| Via relational connectedness | -0.001 (-0.004, 0.001) | - |
| Via social connectedness | -0.006 (-0.016, 0.003) | - |
| Via self-perceived isolation | -0.009 (-0.020, 0.001) | - |
| **Average living space per person** |  |  |
| Via relational connectedness | -0.001 (-0.003, 0.001) | - |
| Via social connectedness | -0.002 (-0.011, 0.007) | - |
| Via self-perceived isolation | -0.002 (-0.010, 0.005) | - |
| **Model 2: measurement factors of social support** (CFI 0.987, TLI 0.938, RMSEA 0.051, sRMR 0.019) | | |
| **Parents’ education** |  |  |
| Via family support | -0.021 (-0.034, -0.007) * | 16.28% |
| Via friends support | -0.004 (-0.013, 0.005) | - |
| Via other significant support | -0.015 (-0.026, -0.004) * | 11.63% |
| **Family economic status** |  |  |
| Via family support | -0.011 (-0.021, -0.001) * | 12.22% |
| Via friends support | -0.002 (-0.006, 0.003) | - |
| Via other significant support | -0.007 (-0.016, 0.002) | - |
| **Average living space per person** |  |  |
| Via family support | -0.011 (-0.020, -0.001) * | 47.83% |
| Via friends support | -0.001 (-0.005, 0.002) | - |
| Via other significant support | -0.008 (-0.016, -0.000) * | 34.78% |
| **Model 3: measurement factors of parent-child relationship** (CFI 0.945, TLI 0.793, RMSEA 0.051, sRMR 0.020) | | |
| **Parents’ education** |  |  |
| Via relationship with father | -0.003 (-0.008, 0.003) | - |
| Via relationship with mother | -0.002 (-0.007, 0.003) | - |
| **Family economic status** |  |  |
| Via relationship with father | -0.001 (-0.007, 0.005) | - |
| Via relationship with mother | -0.001 (-0.006, 0.004) | - |
| **Average living space per person** |  |  |
| Via relationship with father | 0.001 (-0.004, 0.005) | - |
| Via relationship with mother | -0.003 (-0.007, 0.001) | - |

*Notes:* **p* value < 0.05.


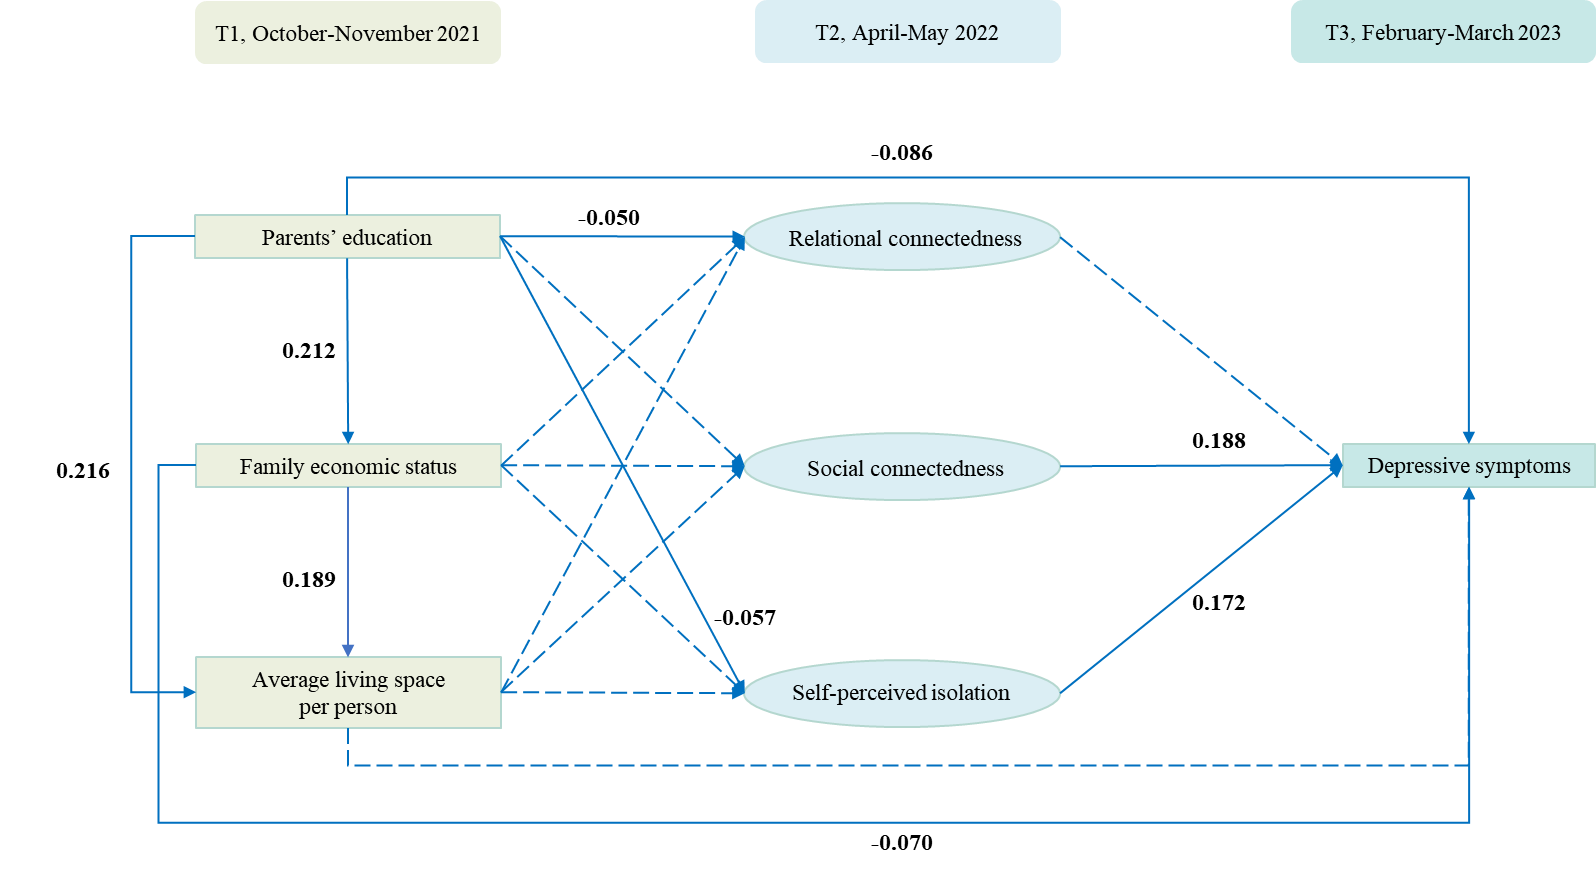


**Fig.S2** Standardized coefficients for the direct effects for model 1 (loneliness mediators). Notes: Single-headed arrows indicate regression paths, and rectangles represent measured variables; Coefficients are shown for statistically significant paths, whereas paths with dashed lines were not significant.


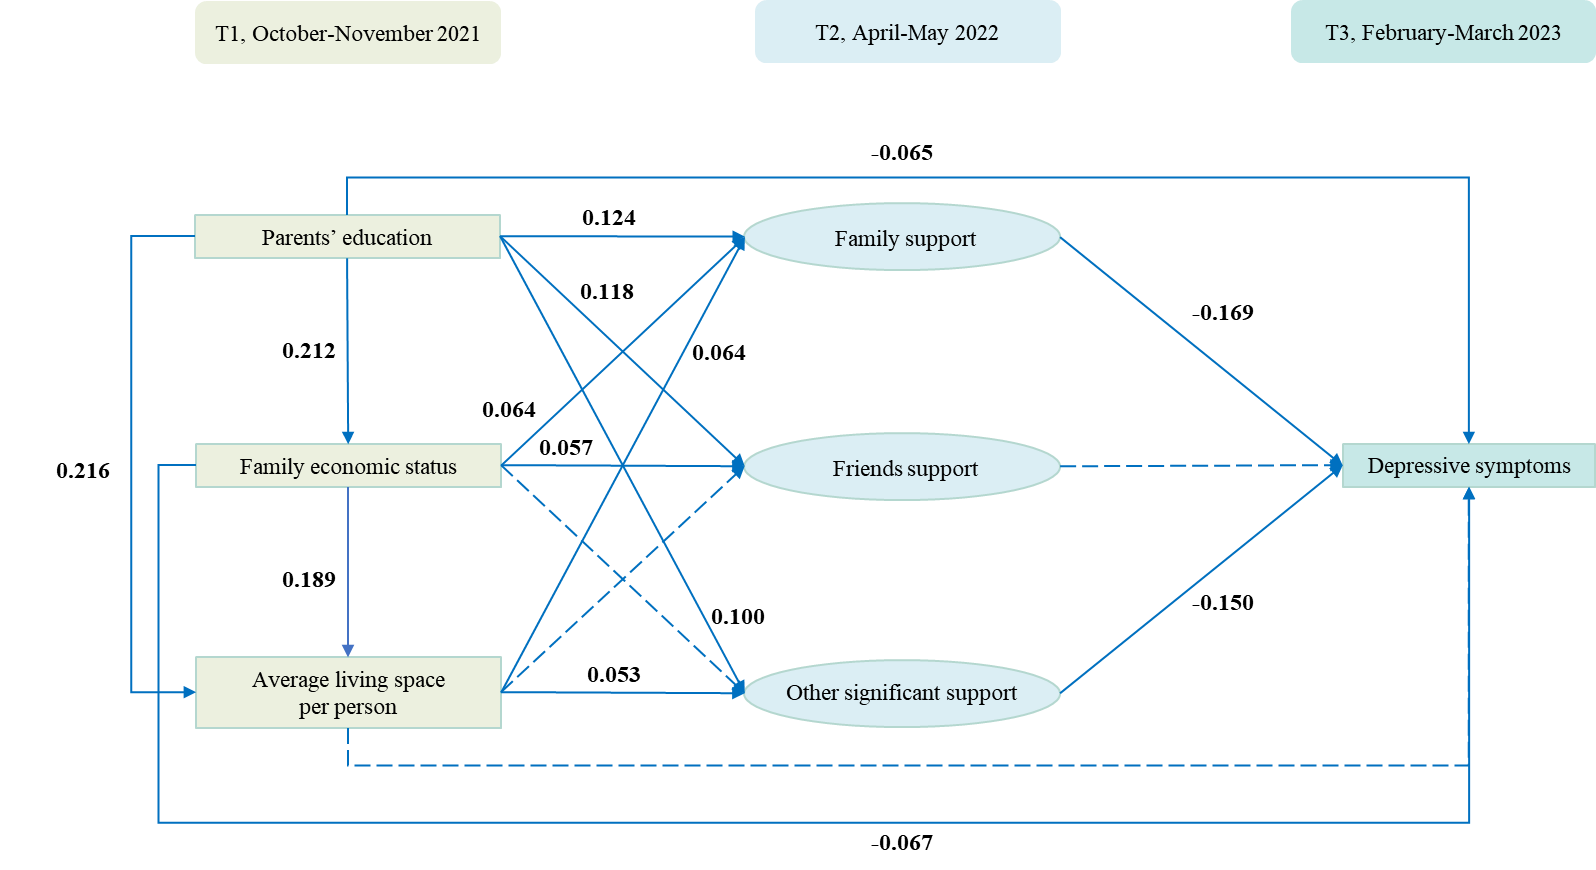


**Fig.S3** Standardized coefficients for the direct effects for model 2 (social support mediators). Notes: Single-headed arrows indicate regression paths, and rectangles represent measured variables; Coefficients are shown for statistically significant paths, whereas paths with dashed lines were not significant.


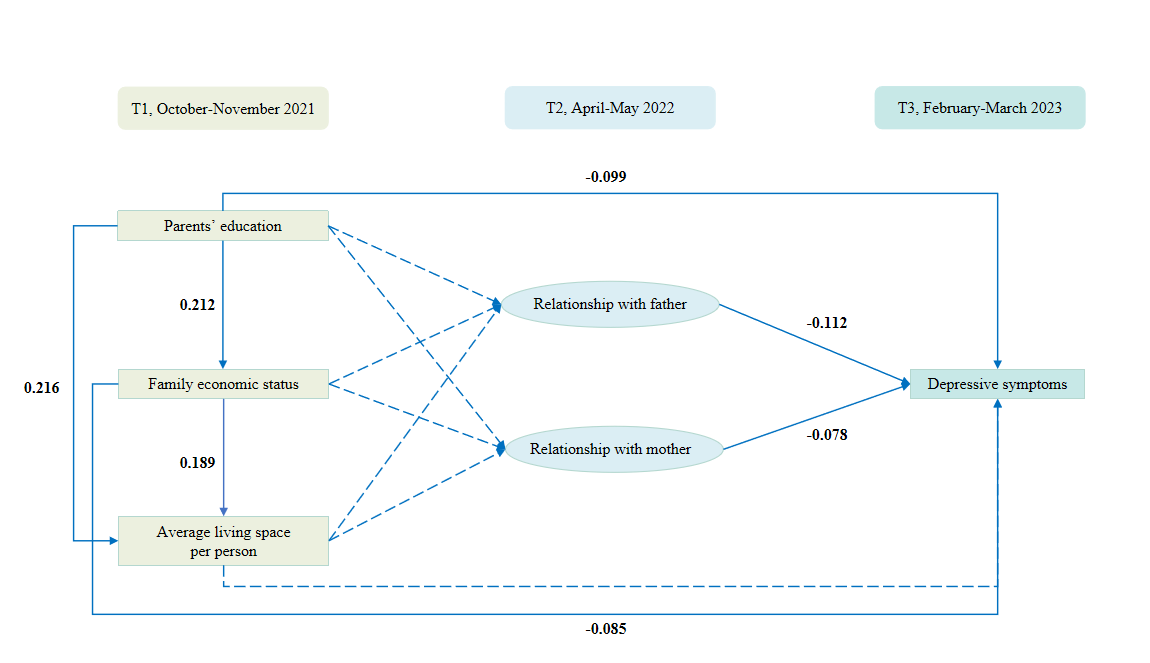


**Fig.S4** Standardized coefficients for the direct effects for model 3 (parent-child relationship mediators). Notes: Single-headed arrows indicate regression paths, and rectangles represent measured variables; Coefficients are shown for statistically significant paths, whereas paths with dashed lines were not significant.

**Table S4** Moderated-mediation of household registration among family economic status, perceived social support, and depressive symptoms

| **Direct effects** | **Coefficient** | **SE** | **Boot 95% CI** | ***p* value** |
| --- | --- | --- | --- | --- |
| Family economic status * Household registration  → Perceived social support | 0.29 | 0.14 | 0.03, 0.56 | 0.031 |
| Family economic status → Perceived social support (Rural) | 0.04 | 0.03 | -0.01, 0.09 | 0.154 |
| Family economic status → Perceived social support (Urban) | 0.33 | 0.13 | 0.07, 0.59 | 0.012 |
| Perceived social support * Household registration  → Depressive symptoms | 0.02 | 0.17 | -0.18, 0.23 | 0.824 |
| Perceived social support → Depressive symptoms | -0.17 | 0.03 | -0.23, -0.12 | <0.001 |
| Family economic status * Household registration  → Depressive symptoms | 0.17 | 0.15 | -0.12, 0.45 | 0.26 |
| Family economic status → Depressive symptoms | -0.06 | 0.03 | -0.11, -0.01 | 0.017 |
| Total | -0.09 | 0.03 | -0.14, -0.03 | 0.002 |
| Indirect effects | Coefficient | SE | Boot 95% CI | *p* value |
| Rural | -0.01 | 0.01 | -0.02, 0.01 | 0.168 |
| Urban | -0.06 | 0.02 | -0.11, -0.01 | 0.020 |
| Difference (index of moderated-mediation) | -0.05 | 0.02 | -0.10, -0.01 | 0.042 |
